# Supplementary material
Source: publisher site journal article supplement (https://www.dovepress.com/get_supplementary_file.php?f=267474.docx)

**Figure S1. The apoptotic rate in cardiomyocytes transfected with siNC, si-SOX2-OT, miR-942-5p, or si-DP5.** (A-B) Apoptotic cardiomyocytes were detected using a flow cytometry. (C-D) Apoptosis rate of primary cardiomyocytes transfected with si-NC, si-SOX2-OT, miR-942-5p mimic or si-DP5. Ns: not significantly.


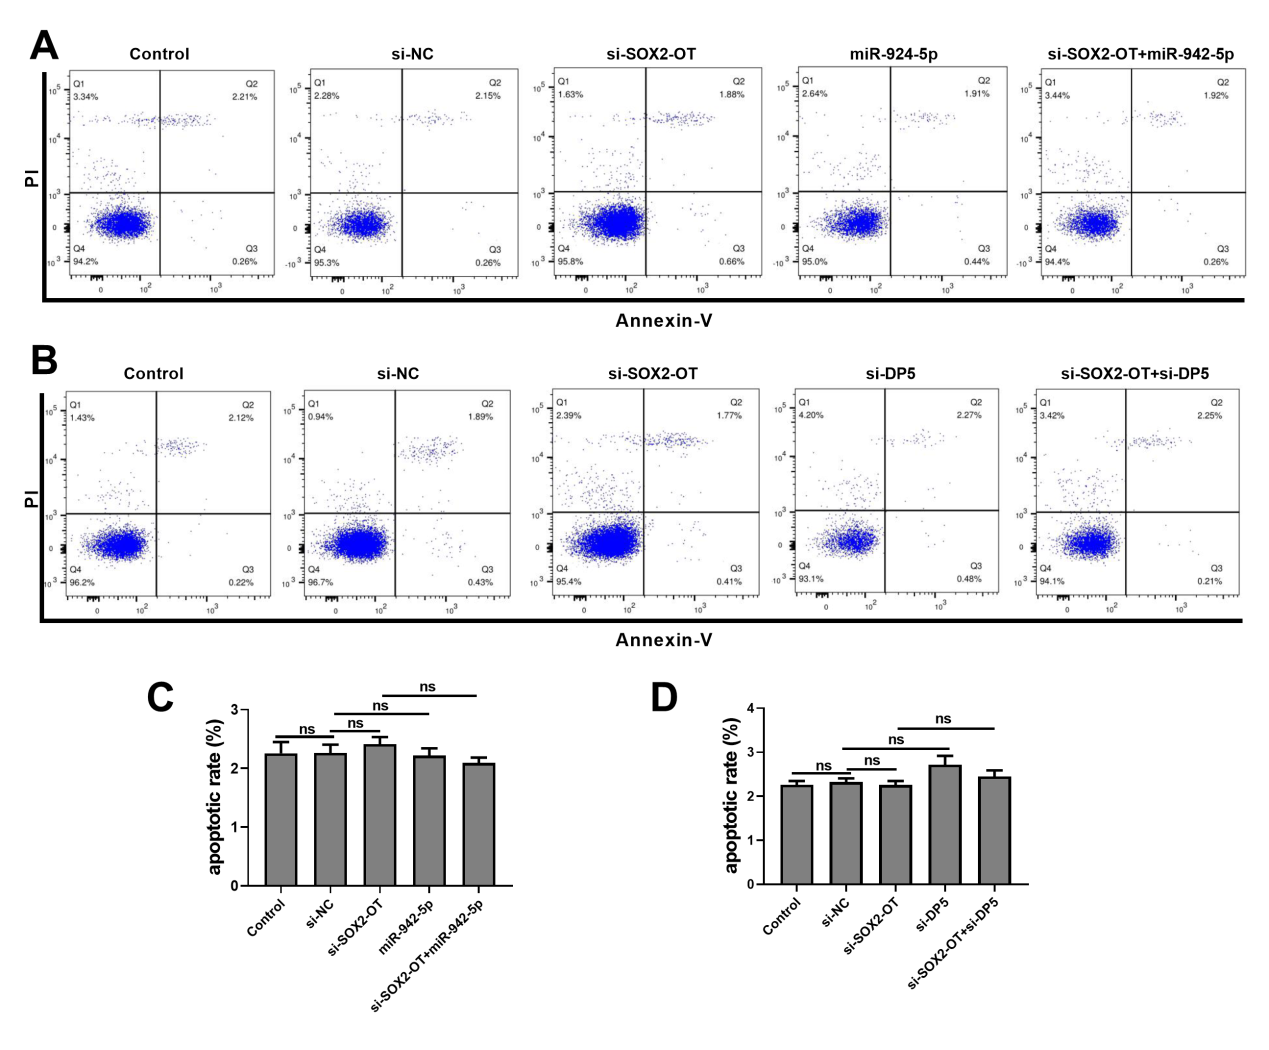

Supplement: Supplementary file 1 [file get_supplementary_file.php]
